# Supplementary material for: A sex-specific thermogenic neurocircuit induced by predator smell recruiting cholecystokinin neurons in the dorsomedial hypothalamus
Source: Springer Nature journal article supplement (doi:10.1038/s41467-023-40484-7), 2023-08-15
Supplement: MOESM1 [file 41467_2023_40484_MOESM1_ESM.pdf]

## **SUPPLEMENTARY FIGURES 1-8**

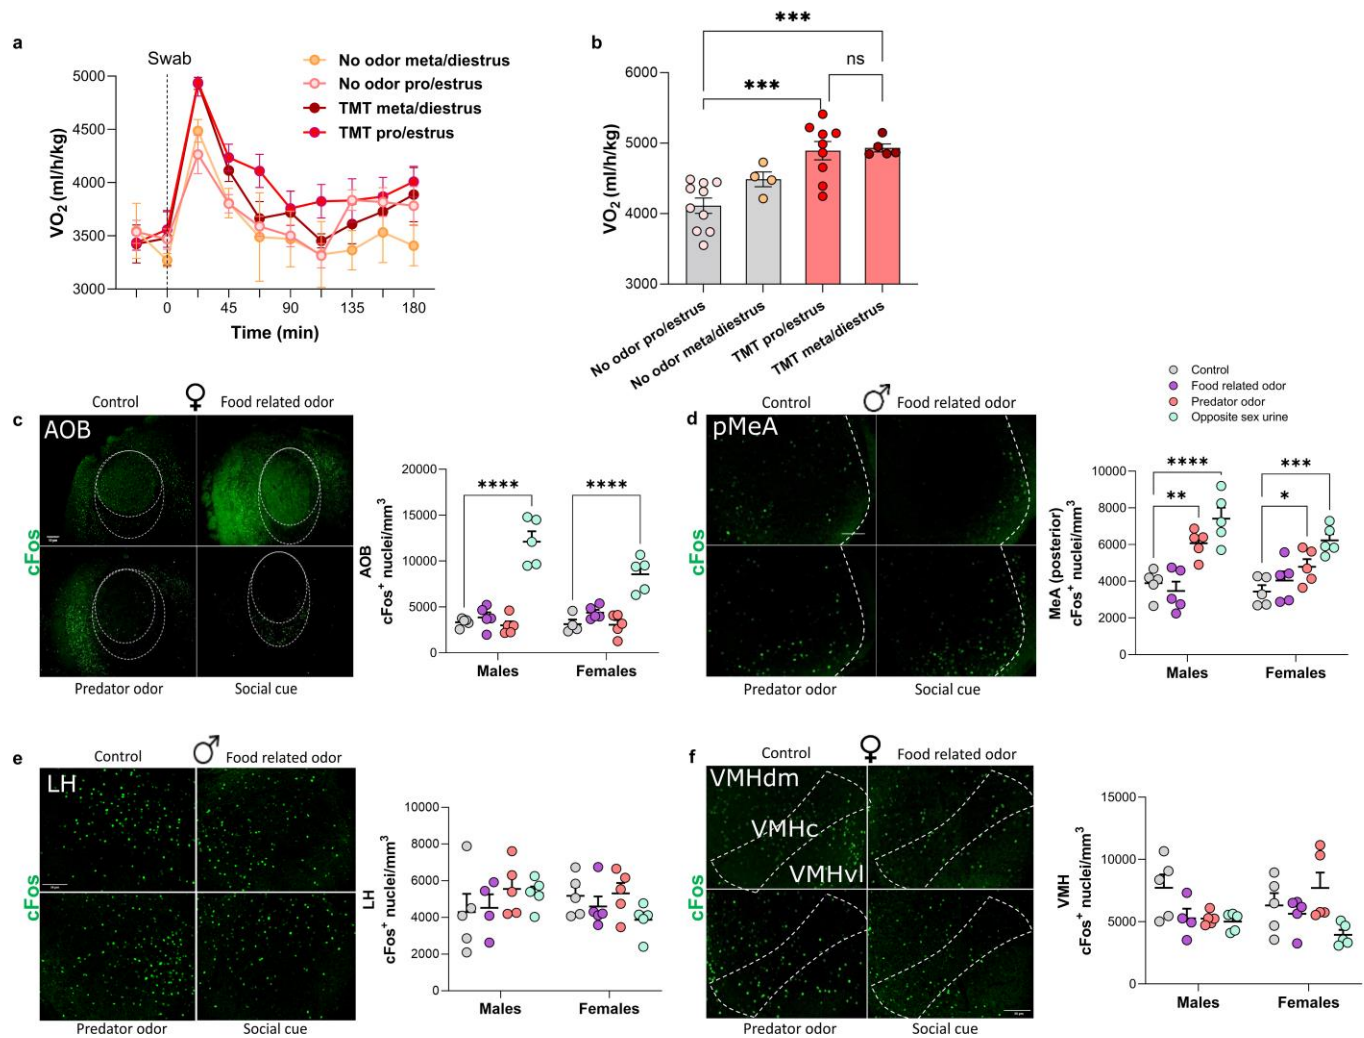

**Supplementary figure 1. Assessment of different estrus cycle phase effects on oxygen consumption upon exposure to predator smell and effect of predator smell on neuronal activity in mediobasal hypothalamus.** **a.** Oxygen consumption 3 hours post-exposure to TMT in females divided into groups by their estrus cycle phase, No odor, N=10/pro-estrus and N=4/meta-diestrus, TMT, N=9/pro-estrus and N=5/meta-diestrus. **b.** Oxygen consumption at first time point post-exposure to TMT, No odor, N=10/pro-estrus and N=4/meta-diestrus, TMT, N=9/pro-estrus and N=5/meta-diestrus, Two-way Anova with Sidak's post hoc comparison. **c,d,e, f.** cFos expression after odor exposure in AOB, pMeA, LH and VMH, respectively, N=5 per group, N=4 per group for AOB control females, LH and VMH food odor males, Two-way Anova with Sidak's post hoc comparison, scale 100 $\mu$ m. All bar graphs are presented as mean values  $\pm$  SEM. Table S8 contains the detailed results of the statistical analysis. \* $p < 0.05$ , \*\* $p < 0.01$ , \*\*\* $p < 0.001$ , \*\*\*\* $p < 0.0001$ . Source data are provided as a Source Data file.

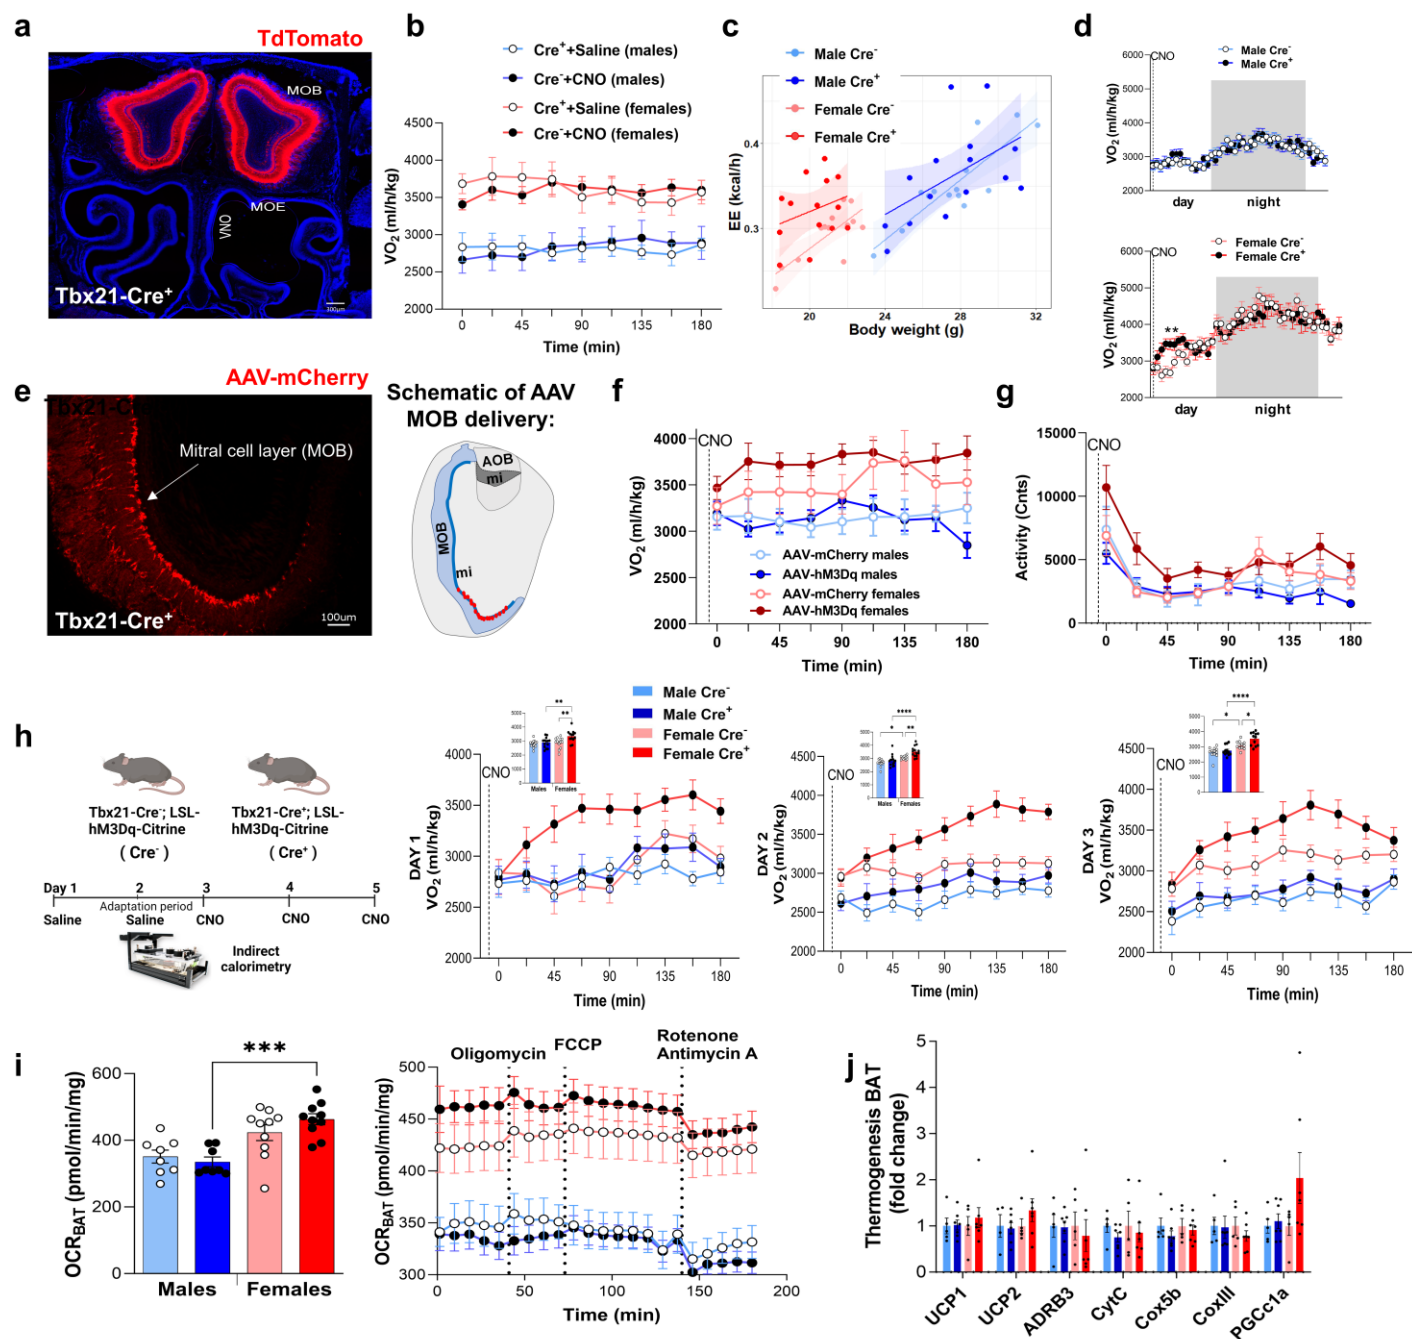

**Supplementary figure 2. Sexually dimorphic modulation of energy expenditure upon activation of mitral and tufted olfactory cells.** **a.** Representative picture of MOE and MOB of Tbx21-Cre<sup>+</sup>/LSL-TdTomato<sup>+</sup> mouse, TdTomato (red), scale 300µm. **b.** Oxygen consumption 3 hours post-injection of saline or CNO, males, N=5 per group, females, N=5/Cre<sup>+</sup>+Saline and N=6/Cre<sup>-</sup>+CNO. **c.** Analysis of covariance (ANCOVA) of energy expenditure (EE) following CNO injection with body weight as covariance, males, N=14/Cre<sup>-</sup> and N=15/Cre<sup>+</sup>, females, N=13/Cre<sup>-</sup> and N=14/Cre<sup>+</sup>, SD: males, Cre<sup>-</sup> 0.047, Cre<sup>+</sup> 0.055, females, Cre<sup>-</sup> 0.031, Cre<sup>+</sup> 0.037. **d.**

Oxygen consumption measured during day and night phases following CNO injection, blue (males), red (females), males, N=14 per group, females, N=13 per group. **e.** Representative picture of mCherry expression in mitral cell layer of MOB upon injection of AAV-DIO-mCherry in MOB of Tbx-Cre mice, mCherry (red) and schematic representation of virus delivery in MOB, Scale bar 100 $\mu$ m. **f,g.** Oxygen consumption and activity 3 hours post-injection of CNO, males, N=6 per group, females, N=5/AAV-mCherry and N=7/AAV-hM3Dq. **h.** Experimental design. Tbx21-Cre<sup>+</sup>/LSL-TdTomato<sup>+</sup> or control mice were treated with saline prior to CNO that was administered for three consecutive days, big panel: Oxygen consumption over three days of consecutive injections of CNO, small panel: Average oxygen consumption measured for 3 hours post-injection of CNO, N=14 per group, females, N=13 per group, Two-way Anova with Tukey's post hoc comparison. **i.** Average oxygen consumption rate (left panel) and oxygen consumption rate of brown adipose tissue measured post-injection of CNO (right panel), males, N=8 per group, females, N=10 per group, Two-way Anova with Tukey's post hoc comparison. **j.** RTqPCR against thermogenesis genes in brown adipose tissue of mice post-injection of CNO, males, N=5/Cre<sup>-</sup> and N=7/Cre<sup>+</sup>, females, N=5/Cre<sup>-</sup> and N=7/Cre<sup>+</sup>. All bar graphs are presented as mean values  $\pm$  SEM. Table S9 contains the detailed results of the statistical analysis. \*p < 0.05, \*\*p < 0.01, \*\*\*p < 0.001, \*\*\*\*p < 0.0001. Source data are provided as a Source Data file.

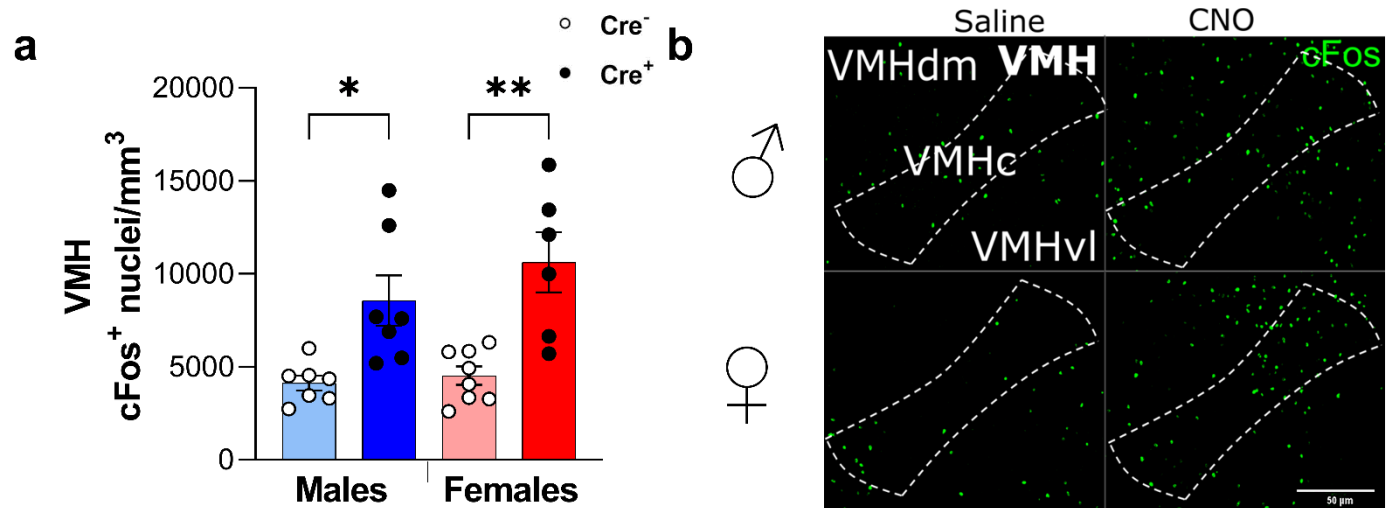

**Supplementary figure 3. cFos expression in VMH post-injection of CNO.** **a.** Quantification of cFos expression in VMH following CNO injection, males, N=7 per group, females, N=8/Cre<sup>-</sup> and N=6/Cre<sup>+</sup>, Two-way Anova with Tukey's post hoc comparison. **b.** Immunostaining of cFos (green) in VMH, scale 50μm. All bar graphs are presented as mean values ± SEM. Table S10 contains the detailed results of the statistical analysis. \*p < 0.05, \*\*p < 0.01. Source data are provided as a Source Data file.

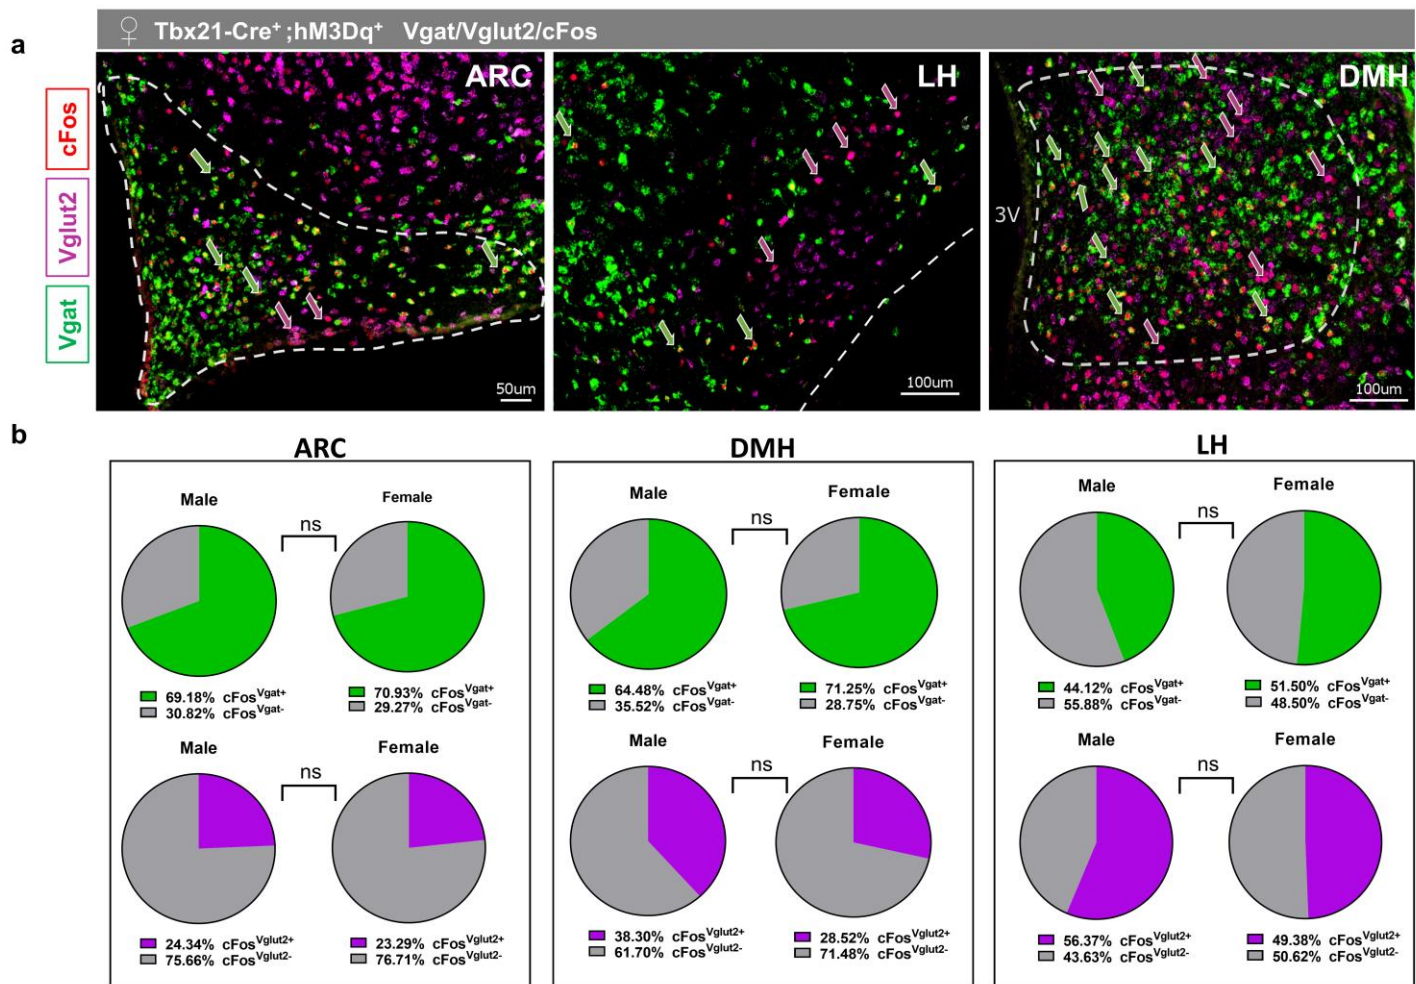

**Supplementary figure 4. Recruitment of GABAergic and glutamatergic MBH neurons by chemogenetic stimulation of MOB neurons.** **a.** Representative images of immunohistochemical and in situ hybridization co-staining in female ARC, LH and DMH for Vgat (green), Vglut2 (magenta) and cFos protein (red), green arrows point to colocalization of Vgat/cFos signal, pink arrows point to colocalization of Vglut2/cFos signal, Scale bar 50µm and 100µm. **b.** Quantification of colocalization between Vgat/cFos and Vglut2/cFos signal in ARC, LH and DMH of male and female mice, N=5 per group, N=4/ARC males, Unpaired t-test, Two-tailed. Source data are provided as a Source Data file.



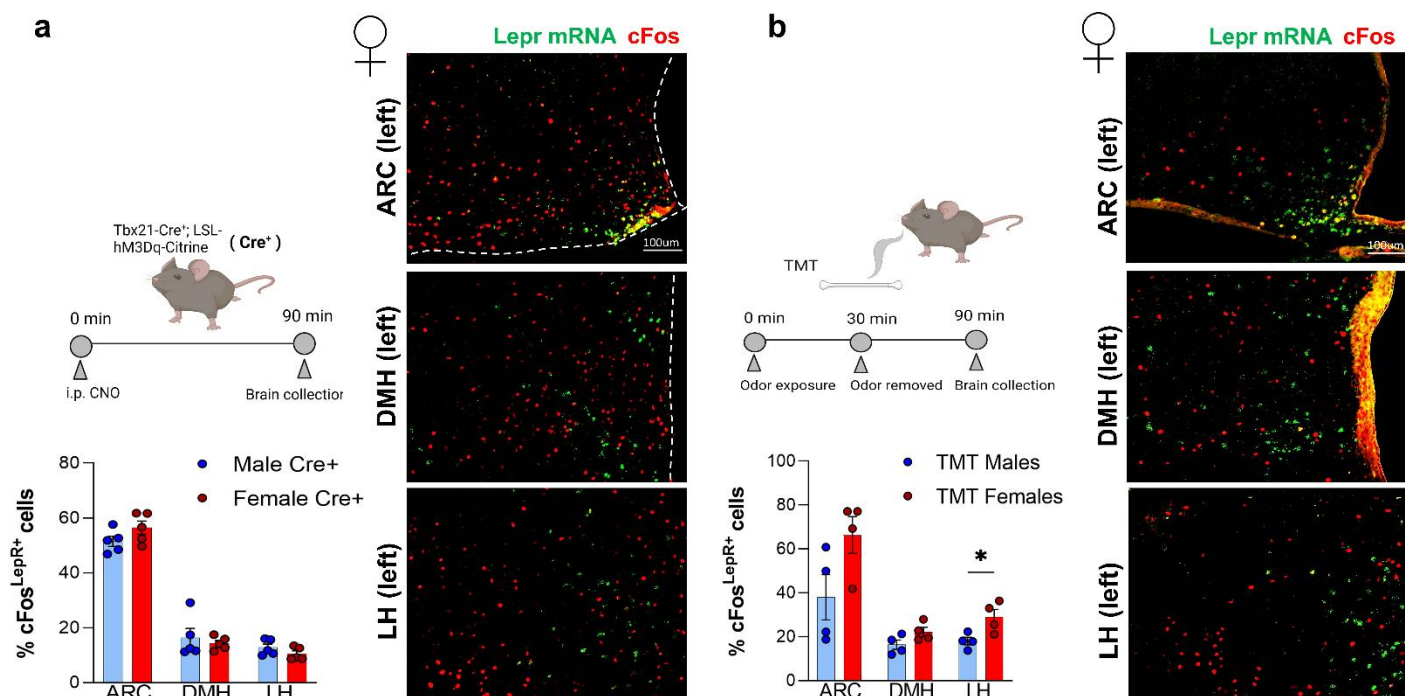

**Supplementary figure 5. Activation of LepR-expressing neurons upon olfactory stimuli.** **a.** Left upper panel: Experimental design. Brain tissue of Cre<sup>+</sup>-hM3Dq<sup>+</sup> and control mice were collected 90 minutes post-injection of CNO, Left lower panel: Quantification of LepR/cFos signal in ARC, DMH and LH, N=5 per group, Right panel: Representative images of immunohistochemical and in situ hybridization co-staining in female ARC, DMH and LH for LepR (green) and cFos protein (red), yellow cells express LepR/cFos, scale 100µm. **b.** Left upper panel: Experimental design. Brain tissue of WT mice exposed to cotton swab with or without TMT for 30 min was collected at 90 minutes time point, Left lower panel: Quantification of LepR/cFos signal in ARC, DMH and LH, N=4 per group, Unpaired t-test, Two-tailed, Right panel: Representative images of immunohistochemical and in situ hybridization co-staining in female ARC, DMH and LH for LepR (green) and cFos protein (red), yellow cells express LepR/cFos, scale 100µm. All bar graphs are presented as mean values ± SEM. Table S11 contains the detailed results of the statistical analysis. \*p < 0.05. Source data are provided as a Source Data file.

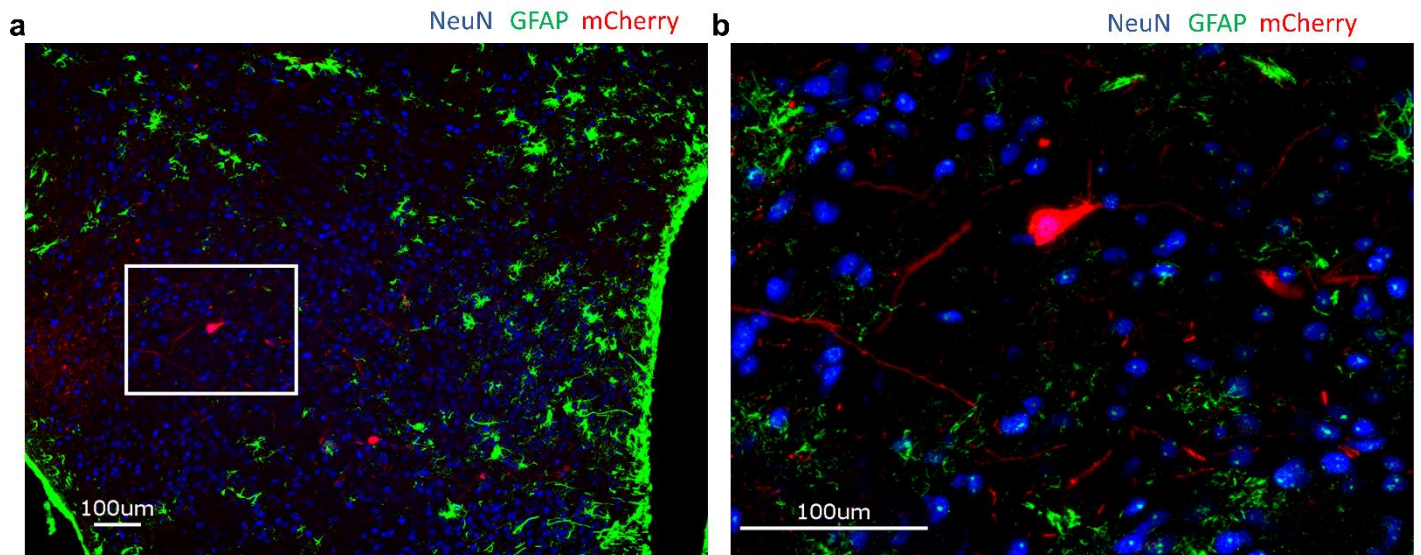

**Supplementary figure 6. Anterograde tracing from MOB reveals neuronal TdTomato positive cells in hypothalamus. a,b.** Immunostaining of NeuN (blue), GFAP (green) and mCherry (red) in mediobasal hypothalamus, Two independent experiments (N=5), scale 100µm.



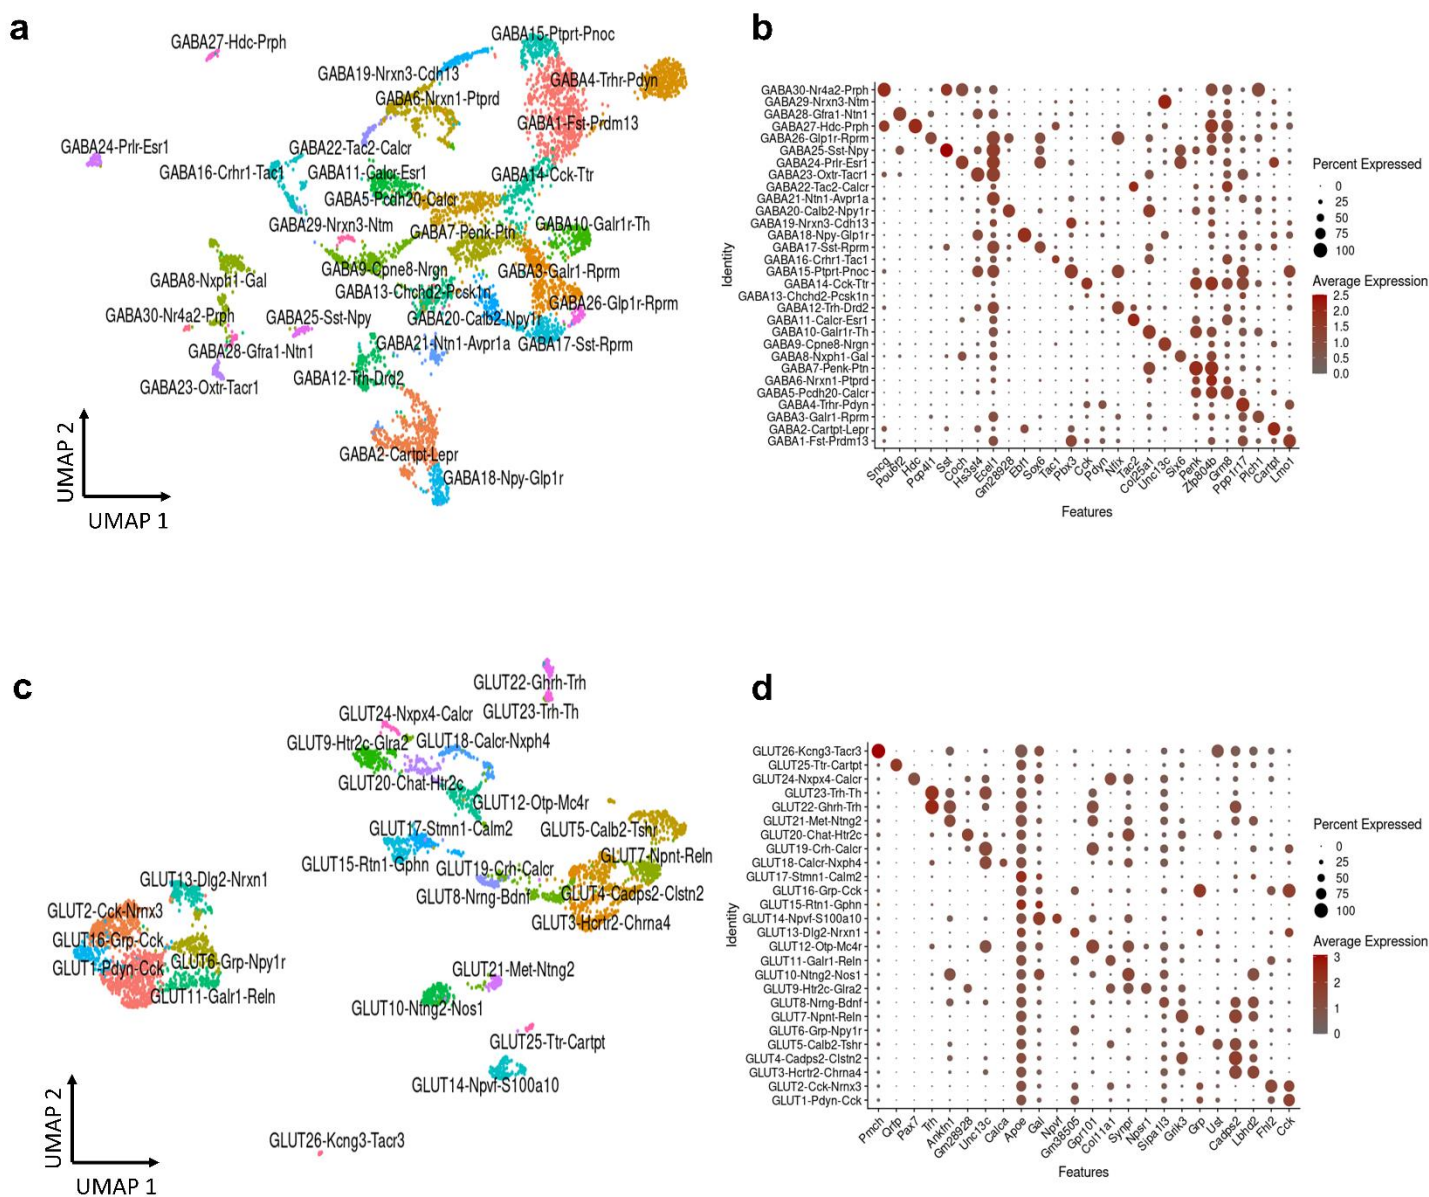

**Supplementary figure 7. Single-cell analysis of dorsomedial hypothalamus.** **a.** Uniform Manifold Approximation and Projection (UMAP) plot of inhibitory clusters (5664 cells). **b.** Expression of top genes in each inhibitory cluster. Dot size indicates the percent of nuclei expressing gene and color indicates intensity of expression. **c.** Uniform Manifold Approximation and Projection (UMAP) plot of excitatory clusters (3972 cells). **d.** Expression of top genes in each excitatory cluster. Dot size indicates the percent of nuclei expressing the gene and color indicates intensity of expression. Source data are provided as a Source Data file.

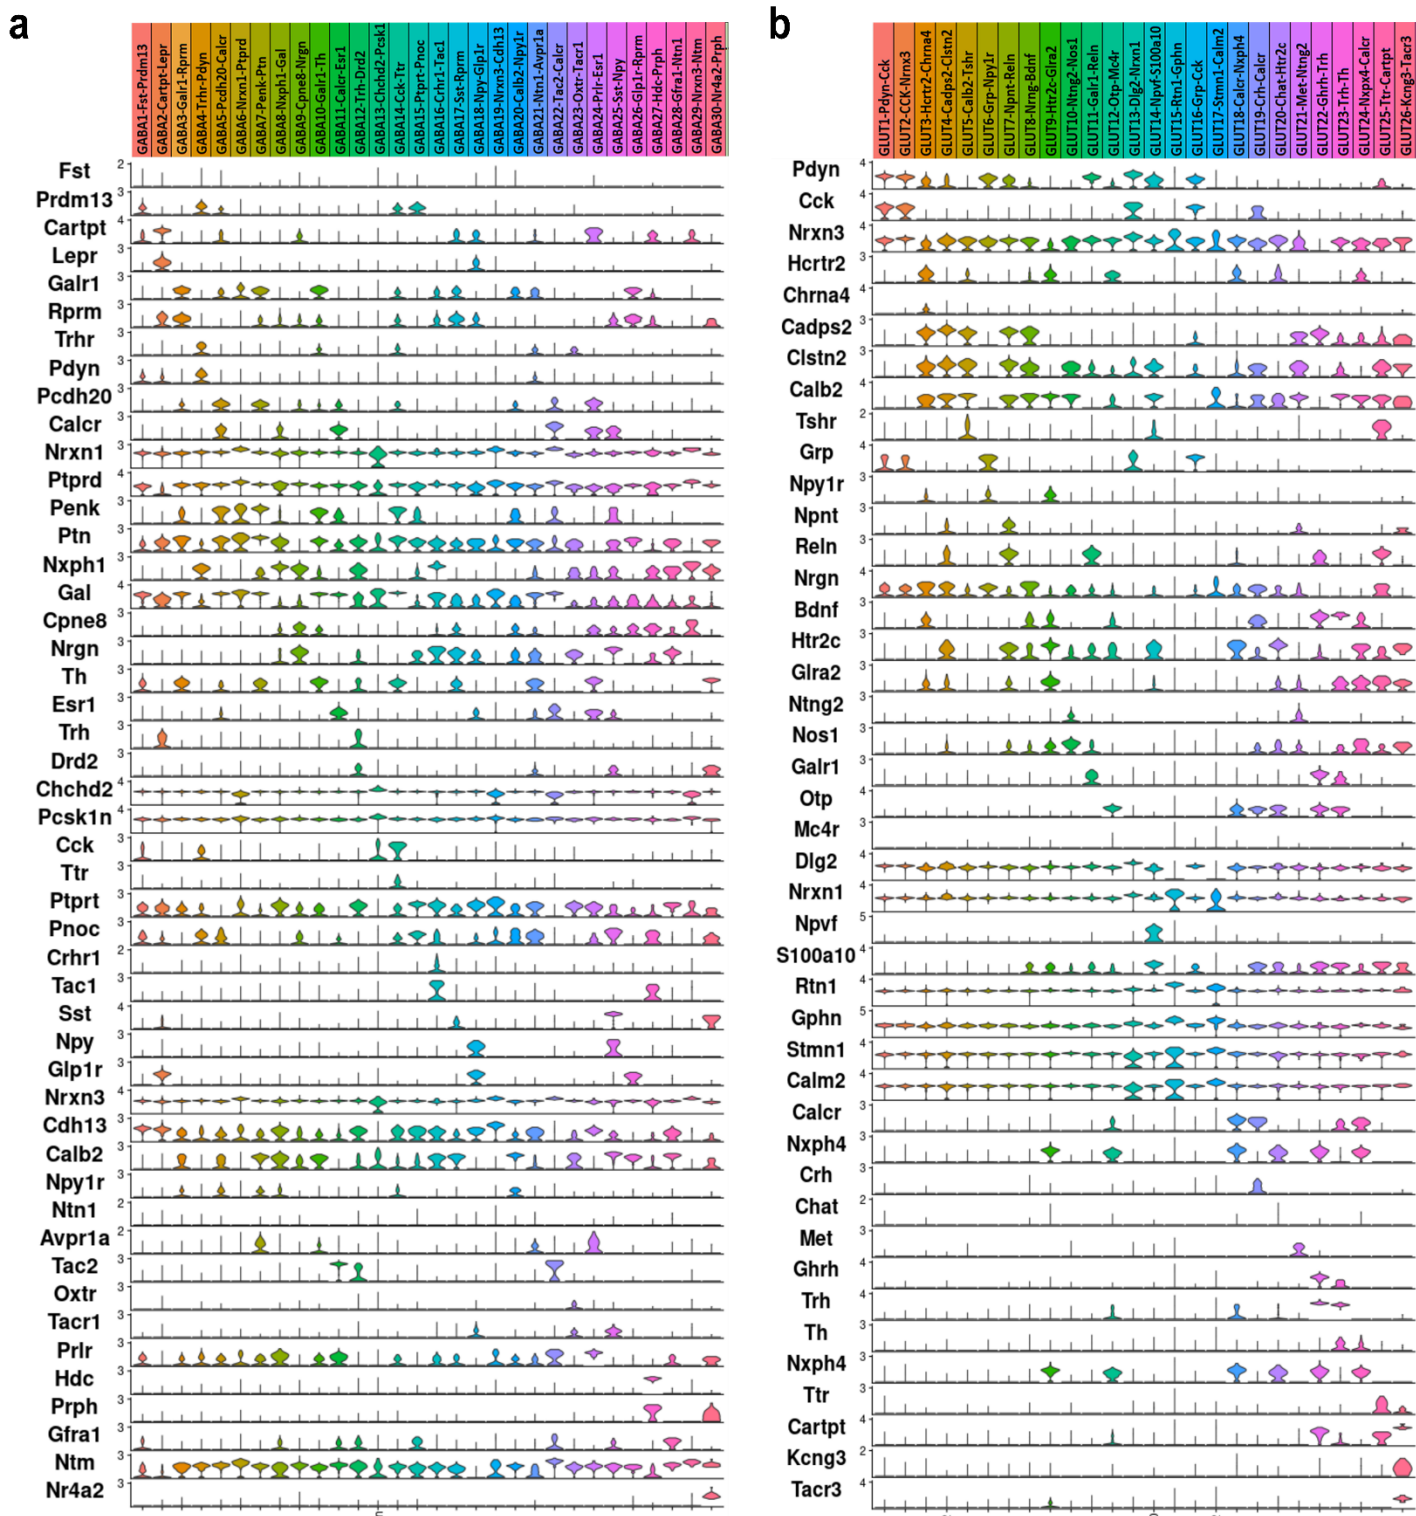

**Supplementary figure 8. Representation of cluster nomenclature genes across inhibitory and excitatory clusters. a.** Violin plot representing the expression levels of genes used for cluster nomenclature in inhibitory clusters (5664 cells). **b.** Violin plot representing the expression levels of genes used for cluster nomenclature in excitatory clusters (3972 cells). Source data are provided as a Source Data file.

**Supplementary Table S1 (related to Figure 1)**

|      |                                                               |                                                                                                                                                                                                                                                                                                                |
|------|---------------------------------------------------------------|----------------------------------------------------------------------------------------------------------------------------------------------------------------------------------------------------------------------------------------------------------------------------------------------------------------|
| b)   | Two-way Anova with Tukey's post hoc comparison, N=12-14/group | $F_{\text{Sex}} (1, 46) = 17.54, P = 0.0001$<br>$F_{\text{Sex} \times \text{Treatment}} (1, 46) = 11.32, P = 0.0016$                                                                                                                                                                                           |
| c,d) | Three-way Anova, N=16/group                                   | $F_{\text{Time}} (5.816, 348.9) = 47.56, P < 0.0001$<br>$F_{\text{Sex}} (1, 60) = 47.75, P < 0.0001$<br>$F_{\text{Time} \times \text{Treatment}} (9, 540) = 3.280, P = 0.0007$<br>$F_{\text{Sex} \times \text{Treatment}} (1, 60) = 7.280, P = 0.0090$                                                         |
| c)   | Two-way Anova with Sidak's post hoc comparison, N=16/group    | $F_{\text{Time}} (5.095, 152.8) = 23.79, P < 0.0001$<br>$F_{\text{Time} \times \text{Treatment}} (9, 270) = 2.359, P = 0.0141$                                                                                                                                                                                 |
| d)   | Two-way Anova with Sidak's post hoc comparison, N=16/group    | $F_{\text{Time}} (5.403, 162.1) = 24.27, P < 0.0001$<br>$F_{\text{Treatment}} (1, 30) = 8.073, P = 0.0080$<br>$F_{\text{Time} \times \text{Treatment}} (9, 270) = 1.929, P = 0.0481$                                                                                                                           |
| e,f) | Three-way Anova, N=16/group                                   | $F_{\text{Time}} (5.010, 300.6) = 21.40, P < 0.0001$<br>$F_{\text{Sex}} (1, 60) = 12.44, P = 0.0008$<br>$F_{\text{Time} \times \text{Treatment}} (9, 540) = 2.790, P = 0.0033$<br>$F_{\text{Time} \times \text{Sex}} (9, 540) = 3.166, P = 0.0010$                                                             |
| e)   | Two-way Anova with Sidak's post hoc comparison, N=16/group    | $F_{\text{Time}} (4.120, 123.6) = 14.65, P < 0.0001$<br>$F_{\text{Time} \times \text{Treatment}} (9, 270) = 2.264, P = 0.0186$                                                                                                                                                                                 |
| f)   | Two-way Anova with Sidak's post hoc comparison, N=16/group    | $F_{\text{Time}} (5.261, 157.8) = 7.471, P < 0.0001$<br>$F_{\text{Treatment}} (1, 30) = 4.836, P = 0.0357$                                                                                                                                                                                                     |
| l,j) | Three-way Anova, N=11/group                                   | $F_{\text{Time}} (4.733, 189.3) = 6.226, P < 0.0001$<br>$F_{\text{Time} \times \text{Sex} \times \text{Treatment}} (6, 240) = 2.751, P = 0.0132$                                                                                                                                                               |
| j)   | Two-way Anova with Sidak's post hoc comparison, N=11/group    | $F_{\text{Time} \times \text{Treatment}} F (6, 120) = 2.680, P = 0.0178$                                                                                                                                                                                                                                       |
| k,l) | Three-way Anova, N=9-10/group                                 | $F_{\text{Time}} F (1.934, 67.69) = 99.12, P < 0.0001$<br>$F_{\text{Sex}} (1, 35) = 4.478, P = 0.0415$<br>$F_{\text{Treatment}} (1, 35) = 51.28, P < 0.0001$<br>$F_{\text{Time} \times \text{Treatment}} (5, 175) = 29.21, P < 0.0001$<br>$F_{\text{Sex} \times \text{Treatment}} (1, 35) = 5.362, P = 0.0266$ |
| k)   | Two-way Anova with Sidak's post hoc comparison, N=9-10/group  | $F_{\text{Time}} (1.557, 26.46) = 49.13, P < 0.0001$<br>$F_{\text{Treatment}} F (1, 17) = 8.911, P = 0.0083$<br>$F_{\text{Time} \times \text{Treatment}} (5, 85) = 3.826, P = 0.0036$                                                                                                                          |
| l)   | Two-way Anova with Sidak's post hoc comparison, N=10/group    | $F_{\text{Time}} (2.088, 37.59) = 51.12, P < 0.0001$<br>$F_{\text{Treatment}} (1, 18) = 62.98, P < 0.0001$<br>$F_{\text{Time} \times \text{Treatment}} (5, 90) = 42.82, P < 0.0001$                                                                                                                            |
| o)   | Two-way Anova with Dunnett's post hoc comparison, N=5/group   | $F_{\text{Sex}} (1, 32) = 7.739, P = 0.0090$<br>$F_{\text{Treatment}} (3, 32) = 8.972, P = 0.0002$                                                                                                                                                                                                             |
| q)   | Two-way Anova with Dunnett's post hoc comparison, N=5/group   | $F_{\text{Treatment}} (3, 32) = 7.887, P = 0.0004$                                                                                                                                                                                                                                                             |

**Supplementary Table S2 (related to Figure 2)**

|      |                                                              |                                                                                                                                                                                                                                                                    |
|------|--------------------------------------------------------------|--------------------------------------------------------------------------------------------------------------------------------------------------------------------------------------------------------------------------------------------------------------------|
| c)   | Two-way Anova with Tukey's post hoc comparison, N=6-8/group  | $F_{\text{Treatment}} (1, 24) = 37.19$ , $P < 0.0001$                                                                                                                                                                                                              |
| d)   | Two-way Anova with Tukey's post hoc comparison, N=6-11/group | $F_{\text{Treatment}} (1, 31) = 5.835$ , $P = 0.0218$                                                                                                                                                                                                              |
| e)   | Two-way Anova with Tukey's post hoc comparison, N=11/group   | $F_{\text{Treatment}} (1, 40) = 15.22$ , $P = 0.0004$                                                                                                                                                                                                              |
| g,h) | Three-way Anova, N=13-14/group                               | $F_{\text{Time}} (5.058, 252.9) = 8.088$ , $P < 0.0001$<br>$F_{\text{Sex}} (1, 50) = 8.295$ , $P = 0.0058$<br>$F_{\text{Treatment}} (1, 50) = 7.824$ , $P = 0.0073$<br>$F_{\text{Time} \times \text{Treatment} \times \text{Sex}} (8, 400) = 2.631$ , $P = 0.0081$ |
| h)   | Two-way Anova with Sidak's post hoc comparison, N=13/group   | $F_{\text{Time}} (4.943, 118.6) = 7.171$ , $P < 0.0001$<br>$F_{\text{Treatment}} (1, 24) = 8.899$ , $P = 0.0065$<br>$F_{\text{Time} \times \text{Treatment}} (8, 192) = 3.312$ , $P = 0.0014$                                                                      |
| m,n) | Three-way Anova, N=10-17/group                               | $F_{\text{Time}} (2.667, 133.4) = 216.6$ , $P < 0.0001$<br>$F_{\text{Sex}} (1, 50) = 16.85$ , $P = 0.0001$<br>$F_{\text{Time} \times \text{Sex}} (8, 400) = 2.631$ , $P < 0.0001$                                                                                  |
| p,q) | Three-way Anova, N=8-12/group                                | $F_{\text{Time}} (5, 180) = 2.632$ , $P = 0.0253$<br>$F_{\text{Sex}} (1, 36) = 31.38$ , $P < 0.0001$<br>$F_{\text{Time} \times \text{Sex}} (5, 180) = 3.005$ , $P = 0.0125$                                                                                        |
| r)   | Two-way Anova with Tukey's post hoc comparison, N=7-8/group  | $F_{\text{Sex}} (1, 26) = 16.47$ $P = 0.0004$<br>$F_{\text{Treatment}} (1, 26) = 9.062$ , $P = 0.0057$<br>$F_{\text{Sex} \times \text{Treatment}} (1, 26) = 6.294$ , $P = 0.0187$                                                                                  |

**Supplementary Table S3 (related to Figure 3)**

|    |                                                              |                                                                                                                                                                                               |
|----|--------------------------------------------------------------|-----------------------------------------------------------------------------------------------------------------------------------------------------------------------------------------------|
| b) | Two-way Anova with Tukey's post hoc comparison, N=6-12/group | $F_{\text{Surgery}} (1, 32) = 92.33$ , $P < 0.0001$                                                                                                                                           |
| c) | Two-way Anova with Tukey's post hoc comparison, N=8-14/group | $F_{\text{Surgery}} (1, 38) = 9.875$ , $P = 0.0032$                                                                                                                                           |
| d) | Two-way Anova with Tukey's post hoc comparison, N=7-12/group | $F_{\text{Treatment}} (1, 32) = 4.305$ , $P = 0.0461$<br>$F_{\text{Surgery}} (1, 32) = 19.10$ , $P = 0.0001$                                                                                  |
| f) | Three-way , N=7-13/group                                     | $F_{\text{Time}} (3.674, 128.6) = 27.23$ , $P < 0.0001$<br>$F_{\text{Treatment}} (1, 35) = 11.35$ , $P = 0.0019$<br>$F_{\text{Time} \times \text{Treatment}} (8, 280) = 3.338$ , $P = 0.0011$ |
| g) | Two-way Anova with Tukey's post hoc comparison, N=7-13/group | $F_{\text{Treatment}} (1, 35) = 23.24$ , $P < 0.0001$                                                                                                                                         |

**Supplementary Table S4 (related to Figure 4)**

|    |                                                             |                                                                                                                                  |
|----|-------------------------------------------------------------|----------------------------------------------------------------------------------------------------------------------------------|
| a) | Two-way Anova with Tukey's post hoc comparison, N=6-8/group | $F_{\text{Treatment}} (1, 24) = 22.53$ , $P < 0.0001$<br>$F_{\text{Sex}} (1, 24) = 4.549$ , $P = 0.0434$                         |
| b) | Two-way Anova with Tukey's post hoc comparison, N=6-7/group | $F_{\text{Treatment}} (1, 22) = 16.72$ , $P = 0.0005$                                                                            |
| c) | Two-way Anova with Tukey's post hoc comparison, N=6-8/group | $F_{\text{Treatment}} (1, 24) = 13.16$ , $P = 0.0013$                                                                            |
| d) | Two-way Anova with Tukey's post hoc comparison, N=6-8/group | $F_{\text{Treatment}} (1, 24) = 19.58$ , $P = 0.0002$<br>$F_{\text{Sex} \times \text{Treatment}} (1, 24) = 4.274$ , $P = 0.0496$ |
| i) | Unpaired t-test, Two-tailed, N=5/group                      | $P = 0.0444$                                                                                                                     |

**Supplementary Table S5 (related to Figure 5)**

|    |                                                           |                                                       |
|----|-----------------------------------------------------------|-------------------------------------------------------|
| b) | Two-way Anova with Tukey's post hoc comparison, N=5/group | $F_{\text{Treatment}} (1, 16) = 48.60$ , $P < 0.0001$ |
| e) | Two-way Anova with Tukey's post hoc comparison, N=5/group | $F_{\text{Treatment}} (1, 16) = 17.23$ , $P = 0.0008$ |
| i) | Two-way Anova with Tukey's post hoc comparison, N=5/group | $F_{\text{Treatment}} (1, 16) = 16.36$ , $P = 0.0009$ |
| j) | Two-way Anova with Tukey's post hoc comparison, N=5/group | $F_{\text{Treatment}} (1, 16) = 11.61$ , $P = 0.0036$ |

**Supplementary Table S6 (related to Figure 6)**

|    |                                                            |                     |
|----|------------------------------------------------------------|---------------------|
| b) | Model-based Analysis of Single-cell Transcriptomics (MAST) | Cck, $P = 1.56E-12$ |
|----|------------------------------------------------------------|---------------------|

**Supplementary Table S7 (related to Figure 8).**

|    |                                                             |                                                                                                                                                                                                                                                                                                               |
|----|-------------------------------------------------------------|---------------------------------------------------------------------------------------------------------------------------------------------------------------------------------------------------------------------------------------------------------------------------------------------------------------|
| d) | Unpaired t-test, N=3-4/group                                | $P = 0.0367$ (males)<br>$P = 0.0398$ (females)                                                                                                                                                                                                                                                                |
| f) | Three-way Anova, N=3-4/group                                | $F_{\text{Time}} (2.556, 28.12) = 120.3$ , $P < 0.0001$<br>$F_{\text{Sex}} (1, 11) = 10.44$ , $P = 0.0080$<br>$F_{\text{Virus}} (1, 11) = 9.974$ , $P = 0.0091$<br>$F_{\text{Time} \times \text{Sex}} (5, 55) = 13.39$ , $P < 0.0001$<br>$F_{\text{Time} \times \text{Virus}} (5, 55) = 4.953$ , $P = 0.0008$ |
| f) | Two-way Anova with Sidak's post hoc comparison, N=3-4/group | <b>Males</b><br>$F_{\text{Time}} (2.375, 14.25) = 53.41$ , $P < 0.0001$<br>$F_{\text{Time} \times \text{Virus}} (5, 30) = 3.006$ , $P = 0.0257$<br><b>Females</b><br>$F_{\text{Time}} (2.219, 11.10) = 64.28$ , $P < 0.0001$<br>$F_{\text{Time} \times \text{Virus}} (5, 25) = 2.839$ , $P = 0.0257$          |



|    |                                                                                                                                                                                                 |                                                                                                                                                                                                                                                                                                                                                                                                                                                                                                              |
|----|-------------------------------------------------------------------------------------------------------------------------------------------------------------------------------------------------|--------------------------------------------------------------------------------------------------------------------------------------------------------------------------------------------------------------------------------------------------------------------------------------------------------------------------------------------------------------------------------------------------------------------------------------------------------------------------------------------------------------|
| j) | Three-way Anova, N=8/group<br><br>Statistical significance in time point 22.5 correspond to values on Fig 8k<br><br>For time point 45 Two-way Anova with Tukey's post hoc comparison, N=8/group | $F_{\text{Time}} (3.377, 94.56) = 8.981, P<0.0001$<br>$F_{\text{Virus}} (1, 28) = 10.16, P=0.0035$<br>$F_{\text{Time} \times \text{Odor}} (9, 252) = 6.173, P<0.0001$<br>$F_{\text{Time} \times \text{Virus}} (9, 252) = 2.258, P=0.0191$<br>$F_{\text{Odor} \times \text{Virus}} F (1, 28) = 0.4890, P=0.4901$<br>$F_{\text{Odor} \times \text{Virus} \times \text{Time}} F (9, 252) = 0.5650, P=0.8251$<br><br>$F_{\text{Odor}} (1, 28) = 23.45, P<0.0001$<br>$F_{\text{Virus}} (1, 28) = 15.01, P=0.0006$ |
| k) | Two-way Anova with Tukey's post hoc comparison, N=8/group VO2 (t=22.5min)                                                                                                                       | $F_{\text{Virus}} (1, 28) = 15.01, P=0.006$<br>$F_{\text{Odor}} (1, 28) = 23.45, P<0.0001$                                                                                                                                                                                                                                                                                                                                                                                                                   |
| l) | Three-way Anova, N=8/group<br><br>Statistical significance in time point 22.5 correspond to values on Fig 8m                                                                                    | $F_{\text{Time}} (5.698, 159.5) = 8.475, P<0.0001$<br>$F_{\text{Time} \times \text{Odor}} (9, 252) = 3.576, P=0.0003$                                                                                                                                                                                                                                                                                                                                                                                        |
| m) | Two-way Anova with Tukey's post hoc comparison, N=8/group Activity (t=22.5min)                                                                                                                  | $F_{\text{Odor}} (1, 28) = 13.01, P=0.0012$                                                                                                                                                                                                                                                                                                                                                                                                                                                                  |
| n) | Three-way Anova, N=6-8/group                                                                                                                                                                    | $F_{\text{Time}} (2.298, 55.14) = 105.4, P<0.0001$<br>$F_{\text{Odor}} (1, 24) = 13.91, P=0.0010$<br>$F_{\text{Virus}} (1, 24) = 5.302, P=0.0303$<br>$F_{\text{Time} \times \text{Odor}} (5, 120) = 6.769, P<0.0001$<br>$F_{\text{Time} \times \text{Virus}} (5, 120) = 3.171, P=0.0101$                                                                                                                                                                                                                     |
| o) | Two-way Anova with Tukey's post hoc comparison, N=6-8/group                                                                                                                                     | $F_{\text{Virus}} (1, 24) = 4.484, P=0.0448$<br>$F_{\text{Odor}} (1, 24) = 10.83, P=0.0031$                                                                                                                                                                                                                                                                                                                                                                                                                  |

**Supplementary Table S8 (related to Supplementary Figure 1)**

|    |                                                               |                                                                                                                        |
|----|---------------------------------------------------------------|------------------------------------------------------------------------------------------------------------------------|
| b) | Two-way Anova with Sidak's post hoc comparison , N=4-10/group | $F_{\text{Treatment}} (1, 24) = 21.98, P<0.0001$                                                                       |
| c) | Two-way Anova with Sidak's post hoc comparison , N=4-5/group  | $F_{\text{Treatment}} (3, 31) = 60.48, P<0.0001$<br>$F_{\text{Treatment} \times \text{Sex}} (3, 31) = 4.335, P=0.0113$ |
| d) | Two-way Anova with Sidak's post hoc comparison , N=4-5/group  | $F_{\text{Treatment}} (3, 32) = 23.79, P<0.0001$                                                                       |

**Supplementary Table S9 (related to Supplementary Figure 2)**

|             |          |                                                                                                                                                                                                                                                                                                                                                                                                                                                                                                                                      |         |        |    |         |        |             |          |   |        |        |       |          |   |        |        |    |          |   |        |        |          |          |   |        |        |           |          |    |  |  |
|-------------|----------|--------------------------------------------------------------------------------------------------------------------------------------------------------------------------------------------------------------------------------------------------------------------------------------------------------------------------------------------------------------------------------------------------------------------------------------------------------------------------------------------------------------------------------------|---------|--------|----|---------|--------|-------------|----------|---|--------|--------|-------|----------|---|--------|--------|----|----------|---|--------|--------|----------|----------|---|--------|--------|-----------|----------|----|--|--|
| c)          | ANCOVA   | <div>Response: EE</div> <table><tr><td></td><td>Sum Sq</td><td>Df</td><td>F value</td><td>Pr(&gt;F)</td></tr><tr><td>(Intercept)</td><td>0.000925</td><td>1</td><td>0.7453</td><td>0.3923</td></tr><tr><td>group</td><td>0.002588</td><td>3</td><td>0.6948</td><td>0.5598</td></tr><tr><td>BW</td><td>0.001602</td><td>1</td><td>1.2901</td><td>0.2617</td></tr><tr><td>group:BW</td><td>0.001620</td><td>3</td><td>0.4350</td><td>0.7289</td></tr><tr><td>Residuals</td><td>0.059596</td><td>48</td><td></td><td></td></tr></table> |         | Sum Sq | Df | F value | Pr(>F) | (Intercept) | 0.000925 | 1 | 0.7453 | 0.3923 | group | 0.002588 | 3 | 0.6948 | 0.5598 | BW | 0.001602 | 1 | 1.2901 | 0.2617 | group:BW | 0.001620 | 3 | 0.4350 | 0.7289 | Residuals | 0.059596 | 48 |  |  |
|             | Sum Sq   | Df                                                                                                                                                                                                                                                                                                                                                                                                                                                                                                                                   | F value | Pr(>F) |    |         |        |             |          |   |        |        |       |          |   |        |        |    |          |   |        |        |          |          |   |        |        |           |          |    |  |  |
| (Intercept) | 0.000925 | 1                                                                                                                                                                                                                                                                                                                                                                                                                                                                                                                                    | 0.7453  | 0.3923 |    |         |        |             |          |   |        |        |       |          |   |        |        |    |          |   |        |        |          |          |   |        |        |           |          |    |  |  |
| group       | 0.002588 | 3                                                                                                                                                                                                                                                                                                                                                                                                                                                                                                                                    | 0.6948  | 0.5598 |    |         |        |             |          |   |        |        |       |          |   |        |        |    |          |   |        |        |          |          |   |        |        |           |          |    |  |  |
| BW          | 0.001602 | 1                                                                                                                                                                                                                                                                                                                                                                                                                                                                                                                                    | 1.2901  | 0.2617 |    |         |        |             |          |   |        |        |       |          |   |        |        |    |          |   |        |        |          |          |   |        |        |           |          |    |  |  |
| group:BW    | 0.001620 | 3                                                                                                                                                                                                                                                                                                                                                                                                                                                                                                                                    | 0.4350  | 0.7289 |    |         |        |             |          |   |        |        |       |          |   |        |        |    |          |   |        |        |          |          |   |        |        |           |          |    |  |  |
| Residuals   | 0.059596 | 48                                                                                                                                                                                                                                                                                                                                                                                                                                                                                                                                   |         |        |    |         |        |             |          |   |        |        |       |          |   |        |        |    |          |   |        |        |          |          |   |        |        |           |          |    |  |  |

|    |                                                                                                     |                                                                                                                                                                                                                                                                                                                                           |
|----|-----------------------------------------------------------------------------------------------------|-------------------------------------------------------------------------------------------------------------------------------------------------------------------------------------------------------------------------------------------------------------------------------------------------------------------------------------------|
| d) | Two-way Anova with Sidak's post hoc comparison , N=13 group, Results for 3 hours post CNO injection | $F_{\text{Time}} (4.943, 118.6) = 7.171, P < 0.0001$<br>$F_{\text{Treatment}} (1, 24) = 8.899, P = 0.0065$<br>$F_{\text{Time} \times \text{Treatment}} (8, 192) = 3.312, P = 0.0014$                                                                                                                                                      |
| h) | Two-way Anova with Sidak's post hoc comparison , N=12-14/group                                      | Day 1<br>$F_{\text{Treatment}} (1, 50) = 8.295, P = 0.0058$<br>$F_{\text{Sex}} (1, 50) = 7.824, P = 0.0073$<br>Day 2<br>$F_{\text{Treatment}} (1, 50) = 11.91, P = 0.0011$<br>$F_{\text{Sex}} (1, 50) = 37.65, P < 0.0001$<br>Day 1<br>$F_{\text{Treatment}} (1, 43) = 6.619, P = 0.0136$<br>$F_{\text{Sex}} (1, 43) = 37.09, P < 0.0001$ |
| i) | Two-way Anova with Tukey's post hoc comparison , N=8-10/group                                       | $F_{\text{Sex}} (1, 32) = 26.29, P < 0.0001$                                                                                                                                                                                                                                                                                              |

**Supplementary Table S10 (related to Supplementary Figure 3)**

|    |                                                               |                                                    |
|----|---------------------------------------------------------------|----------------------------------------------------|
| a) | Two-way Anova with Tukey's post hoc comparison , N=4-10/group | $F_{\text{Treatment}} (1, 24) = 26.31, P < 0.0001$ |
|----|---------------------------------------------------------------|----------------------------------------------------|

**Supplementary Table S11 (related to Supplementary Figure 5)**

|    |                                        |              |
|----|----------------------------------------|--------------|
| b) | Unpaired t test, Two-tailed, N=4/group | $P = 0.0303$ |
|----|----------------------------------------|--------------|
