# Supplementary material for: A sex-specific thermogenic neurocircuit induced by predator smell recruiting cholecystokinin neurons in the dorsomedial hypothalamus
Source: Springer Nature journal article supplement (doi:10.1038/s41467-023-40484-7), 2023-08-15
Supplement: MOESM3 [file 41467_2023_40484_MOESM3_ESM.pdf]

## **Description of Additional Supplementary Files**

**Supplementary Movie 1.** Light sheet imaging of the cleared brain upon OBTbx21chemogenetic activation. iDISCO tissue clearing was applied to a Cre<sup>+</sup>-hM3Dq<sup>+</sup> female brain and immunostaining was performed for cFos (red). Green channel was used as autofluorescence.
